# Supplementary material for: Transcriptional Analysis Revealing the Improvement of ε-Poly-L-lysine Production from Intracellular ROS Elevation after Botrytis cinerea Induction
Source: MDPI journal article supplement (doi:10.3390/jof10050324), 2024-04-29
Supplement: s1 [file s1]

# Transcriptional Analysis Revealing the Improvement of $\epsilon$ -Poly-L-lysine Production from Intracellular ROS Elevation after *Botrytis cinerea* Induction

Chen Zhang <sup>1,2,†</sup>, Zhanyang Zhang <sup>1,2,†</sup>, Ya Cheng <sup>1,2</sup>, Ni Ni <sup>1,2</sup>, Siyu Tong <sup>1,2</sup>, Wangbao Da <sup>1,2</sup>, Chunyan Liu <sup>1,2</sup>, Qiran Diao <sup>1,2</sup>, Ziyan Chen <sup>1,2</sup>, Bingyue Xin <sup>1,2</sup>, Huawei Zeng <sup>1,2</sup>, Xin Zeng <sup>1,2,\*</sup> and Dayong Xu <sup>1,2,\*</sup>

<sup>1</sup> Anhui Province Key Laboratory of Pollutant Sensitive Materials and Environmental Remediation, Huaibei Normal University, Huaibei 235000, China; zc199910162023@163.com (C.Z.); zyzhang123123@163.com (Z.Z.); 18365587657@163.com (Y.C.); 19577398660@163.com (N.N.); t13637219368@163.com (S.T.); dawangbao2023@163.com (W.D.); 18133151637@163.com (C.L.); 18715262486@163.com (Q.D.); czy3024769527@163.com (Z.C.); xinbingyuex@163.com (B.X.); huaweizeng@163.com (H.Z.)

<sup>2</sup> School of Life Sciences, Huaibei Normal University, Huaibei 235099, China

\* Correspondence: cengx@chnu.edu.cn (X.Z.); xudy@chnu.edu.cn (D.X.)

† These authors contributed equally to this work. .

**Table S1** Primer pairs sequences for quantitative real-time PCR (qRT-PCR) assay.

| Target gene | Primer name          | Primer sequence (5'-3') |
|-------------|----------------------|-------------------------|
| 16s rRNA    | 16s rRNA-forward     | GCACAAGCAGCGGAGCAT      |
|             | 16s rRNA -reverse    | CCCAACATCTCACGACACGA    |
| <i>zwf</i>  | <i>zwf</i> -forward  | CGTCCACGAGGTCTTCCC      |
|             | <i>zwf</i> -reverse  | GGAGGAGGTGGTTCTGGATG    |
| N1H47_01765 | N1H47_01765 -forward | CTAACTCAGCAGGCACTGTGTC  |
|             | N1H47_01765 -reverse | GACGTGGTAGGCGTTCTCC     |
| N1H47_21215 | N1H47_21215 -forward | GTCCGCTCCTCCTTCTCG      |
|             | N1H47_21215 -reverse | CCGACGACCGTGACCTTC      |
| N1H47_14640 | N1H47_14640 -forward | GCCTTCAAGCAGGACATCAC    |
|             | N1H47_14640 -reverse | GGTTGTGGCTGTCCTGGTAG    |
| N1H47_16885 | N1H47_16885 -forward | GAGCTGTCCCAGACCATCG     |
|             | N1H47_16885 -reverse | GTTGGACCGGATGAAGACG     |
| N1H47_34205 | N1H47_34205 -forward | CCCTGTGGTCGTCGTTTCG     |
|             | N1H47_34205 -reverse | GAAGAGGTGGGTCTGCAGGA    |
| N1H47_11760 | N1H47_11760 -forward | ACCGTGTACTACAACTTCGCG   |
|             | N1H47_11760 -reverse | ACGTACAGCTGGGTGAGGG     |
| N1H47_11815 | N1H47_11815 -forward | AGGTGCTGCCCTGTCTGC      |
|             | N1H47_11815 -reverse | GTTCCGGGAGGCCATCAG      |
| N1H47_25630 | N1H47_25630 -forward | CACTACACCGCCGACGAA      |
|             | N1H47_25630 -reverse | AGGGTGTTGTAGACCGTGGC    |
| N1H47_35560 | N1H47_35560 -forward | CCTCATGGTGCTCGACGTC     |
|             | N1H47_35560 -reverse | CGGAAGGTAGTCGTCGGC      |

**Table S2** Transcriptome analysis of genes coding for enzymes in  $\epsilon$ -PL biosynthesis pathways among cells with different intracellular ROS levels.

| Reaction         | Gene ID            | CK fpkm | LOS fpkm | HOS fpkm | Gene description                         |
|------------------|--------------------|---------|----------|----------|------------------------------------------|
| <b>EMP</b>       |                    |         |          |          |                                          |
| 1                | <i>N1H47_30055</i> | 35.68   | 76.51    | 86.51    | Glucokinase                              |
| 2                | <i>pgi</i>         | 43.83   | 81.58    | 28.62    | Glucose-6-phosphate isomerase            |
| 3                | <i>N1H47_11860</i> | 13.44   | 12.35    | 4.53     | Phosphofructokinase                      |
| 4                | <i>fbaA</i>        | 32.76   | 30.24    | 31.22    | Fructose-bisphosphate aldolase           |
| 5                | <i>tpiA</i>        | 21.48   | 74.82    | 45.95    | Triosephosphate isomerase                |
| 6                | <i>gap</i>         | 38.84   | 122.32   | 83.42    | Glyceraldehyde 3-phosphate dehydrogenase |
| 7                | <i>N1H47_10960</i> | 39.26   | 112.01   | 90.60    | Phosphoglycerate kinase                  |
| 8                | <i>N1H47_22570</i> | 2287.06 | 2590.98  | 1256.65  | Phosphoglycerate mutase                  |
| 9                | <i>eno</i>         | 51.85   | 71.29    | 36.87    | Enolase                                  |
| 10               | <i>pyk</i>         | 34.48   | 60.91    | 38.46    | Pyruvate kinase                          |
| 11               | <i>N1H47_01765</i> | 7.45    | 9.58     | 10.98    | Phosphoenolpyruvate carboxylase          |
| <b>PPP</b>       |                    |         |          |          |                                          |
| 12               | <i>zwf</i>         | 123.19  | 232.08   | 295.68   | Glucose-6-phosphate dehydrogenase        |
| 13               | <i>pgl</i>         | 61.04   | 93.14    | 127.12   | 6-phosphogluconolactonase                |
| 14               | <i>gndA</i>        | 676.42  | 838.07   | 400.21   | Gluconate-6-phosphate dehydrogenase      |
| 15               | <i>N1H47_14255</i> | 745.10  | 1208.97  | 1255.08  | Ribose 5-phosphate isomerase             |
| 16               | <i>N1H47_16385</i> | 38.30   | 34.64    | 37.65    | Ribose-phosphate pyrophosphokinase       |
| <b>TCA cycle</b> |                    |         |          |          |                                          |
| 17               | <i>N1H47_14640</i> | 117.99  | 144.13   | 218.72   | Citrate synthase                         |
| 18               | <i>acnA</i>        | 117.37  | 123.09   | 89.84    | Aconitate hydratase                      |
| 19               | <i>N1H47_08375</i> | 84.71   | 73.69    | 85.14    | Isocitrate dehydrogenase                 |

---

|    |                    |        |        |        |                                         |
|----|--------------------|--------|--------|--------|-----------------------------------------|
| 20 | <i>N1H47_26000</i> | 15.12  | 14.60  | 20.91  | Oxoglutarate dehydrogenase E1 component |
|    | <i>sucB</i>        | 29.74  | 29.21  | 24.00  | Oxoglutarate dehydrogenase E2 component |
|    | <i>lpdA</i>        | 148.34 | 194.07 | 127.39 | Oxoglutarate dehydrogenase E3 component |
| 21 | <i>sucD</i>        | 261.14 | 320.37 | 320.12 | Succinyl-CoA synthetase subunit alpha   |
|    | <i>sucC</i>        | 153.98 | 208.61 | 147.58 | Succinyl-CoA synthetase subunit beta    |
| 22 | <i>N1H47_11475</i> | 68.92  | 100.37 | 87.38  | Succinate dehydrogenase                 |
| 23 | <i>N1H47_24965</i> | 36.56  | 35.02  | 37.94  | Fumarate hydratase                      |

#### DAp

|    |                    |       |        |       |                                            |
|----|--------------------|-------|--------|-------|--------------------------------------------|
| 26 | <i>N1H47_21215</i> | 58.99 | 93.25  | 60.88 | Aspartate kinase                           |
| 27 | <i>N1H47_21220</i> | 58.11 | 125.03 | 69.30 | Aspartate-semialdehyde dehydrogenase       |
| 28 | <i>dapA</i>        | 18.51 | 18.10  | 10.48 | 4-Hydroxy-tetrahydrodipicolinate synthase  |
| 29 | <i>dapB</i>        | 57.58 | 67.08  | 98.66 | 4-Hydroxy-tetrahydrodipicolinate reductase |
| 30 | <i>dapC</i>        | 31.54 | 54.96  | 58.14 | Diaminopimelate aminotransferase           |
| 31 | <i>dapF</i>        | 42.09 | 28.64  | 27.39 | Diaminopimelate epimerase                  |
| 32 | <i>lysA</i>        | 49.84 | 58.61  | 77.04 | Diaminopimelate decarboxylase              |

#### $\epsilon$ -PL accumulation

|    |                    |       |       |       |                                 |
|----|--------------------|-------|-------|-------|---------------------------------|
| 33 | <i>N1H47_34205</i> | 23.66 | 41.01 | 22.83 | $\epsilon$ -PL synthase         |
| 34 | <i>N1H47_32795</i> | 5.24  | 1.22  | 2.81  | $\epsilon$ -PL degrading enzyme |

#### Glutamate synthesis

|    |                    |        |        |        |                                  |
|----|--------------------|--------|--------|--------|----------------------------------|
| 35 | <i>glbB</i>        | 55.94  | 115.84 | 120.83 | Glutamate synthase subunit alpha |
|    | <i>N1H47_11385</i> | 167.98 | 212.73 | 250.29 | Glutamate synthase subunit beta  |

---

**Table S3** Influences of intracellular ROS levels on the genes' transcription concerning energy production.

| Gene ID             | CK<br>fpkm | LOS<br>fpkm | HOS<br>fpkm | Gene description                                                 |
|---------------------|------------|-------------|-------------|------------------------------------------------------------------|
| <b>Complex I</b>    |            |             |             |                                                                  |
| <i>N1H47_17850</i>  | 55.30      | 39.53       | 3.62        | NADH dehydrogenase subunit A                                     |
| <i>N1H47_17990</i>  | 15.86      | 12.75       | 23.38       | NADH dehydrogenase subunit B                                     |
| <i>N1H47_18410</i>  | 2903.41    | 3248.27     | 4703.27     | NADH dehydrogenase subunit C                                     |
| <i>N1H47_17980</i>  | 9.94       | 7.97        | 10.00       | NADH dehydrogenase subunit D                                     |
| <i>nuoE</i>         | 22.86      | 19.61       | 26.97       | NADH dehydrogenase subunit E                                     |
| <i>nuoF</i>         | 85.38      | 79.65       | 163.66      | NADH dehydrogenase subunit F                                     |
| <i>N1H47_17965</i>  | 56.85      | 70.90       | 148.05      | NADH dehydrogenase subunit G                                     |
| <i>nuoI</i>         | 198.62     | 202.25      | 182.04      | NADH dehydrogenase subunit I                                     |
| <i>N1H47_17950</i>  | 114.09     | 132.22      | 159.97      | NADH dehydrogenase subunit J                                     |
| <i>nuoK</i>         | 496.33     | 373.54      | 565.08      | NADH dehydrogenase subunit K                                     |
| <i>nuoL</i>         | 98.61      | 81.28       | 122.15      | NADH dehydrogenase subunit L                                     |
| <i>N1H47_17935</i>  | 218.47     | 257.69      | 322.13      | NADH dehydrogenase subunit M                                     |
| <i>nuoN</i>         | 71.38      | 120.92      | 99.12       | NADH dehydrogenase subunit N                                     |
| <i>N1H47_17835</i>  | 140.44     | 172.43      | 139.43      | NADH dehydrogenase subunit<br>NuoH2                              |
| <i>N1H47_17830</i>  | 52.23      | 49.52       | 47.67       | NADH dehydrogenase subunit NuoI2                                 |
| <b>Complex III</b>  |            |             |             |                                                                  |
| <i>N1H47_11985</i>  | 1405.11    | 2187.52     | 1333.84     | Ubiquinol-cytochrome C reductase<br>iron-sulfur 'Rieske' subunit |
| <i>N1H47_11980</i>  | 29.44      | 48.86       | 57.38       | Menaquinol-cytochrome C reductase<br>cytochrome b subunit        |
| <b>Complex IV</b>   |            |             |             |                                                                  |
| <i>ctaD</i>         | 58.72      | 74.40       | 53.18       | Cytochrome c oxidase subunit I                                   |
| <i>coxB</i>         | 3.32       | 8.55        | 11.75       | Cytochrome c oxidase subunit II                                  |
| <i>N1H47_11995</i>  | 2047.29    | 3098.15     | 3875.01     | Cytochrome c oxidase subunit III                                 |
| <b>ATP synthase</b> |            |             |             |                                                                  |
| <i>atpA</i>         | 359.88     | 443.50      | 329.43      | ATP synthase subunit alpha                                       |
| <i>atpD</i>         | 9.79       | 9.80        | 6.84        | ATP synthase subunit beta                                        |
| <i>N1H47_26255</i>  | 3.69       | 6.14        | 0.97        | ATP synthase subunit gamma                                       |
| <i>N1H47_26245</i>  | 219.96     | 251.91      | 294.54      | ATP synthase subunit delta                                       |
| <i>N1H47_26265</i>  | 2.58       | 4.34        | 1.18        | ATP synthase subunit epsilon                                     |
| <i>atpB</i>         | 7.30       | 22.69       | 13.38       | ATP synthase subunit A                                           |
| <i>N1H47_26240</i>  | 57.00      | 72.40       | 95.18       | ATP synthase subunit B                                           |
| <i>atpE</i>         | 21.53      | 66.92       | 24.76       | ATP synthase subunit C                                           |

**Table S4** Influences of intracellular ROS levels on the genes' transcription concerning transcriptional regulator and secondary metabolites biosynthesis.

| Gene ID                                            | CK<br>fpkm | LOS<br>fpkm | HOS<br>fpkm | Gene description                        |
|----------------------------------------------------|------------|-------------|-------------|-----------------------------------------|
| <b>Transcriptional regulators</b>                  |            |             |             |                                         |
| <i>cynR</i>                                        | 508.97     | 895.42      | 784.97      | Transcriptional regulator CynR          |
| <i>N1H47_25630</i>                                 | 299.81     | 868.58      | 706.28      | FurA family transcriptional regulator   |
| <i>N1H47_11470</i>                                 | 422.80     | 832.65      | 702.49      | LysR family transcriptional regulator   |
| <i>N1H47_03465</i>                                 | 364.00     | 548.44      | 1124.80     | LysR family transcriptional regulator   |
| <i>N1H47_15470</i>                                 | 257.71     | 315.49      | 707.20      | LysR family transcriptional regulator   |
| <i>N1H47_21305</i>                                 | 35.57      | 54.10       | 100.45      | LysR family transcriptional regulator   |
| <i>N1H47_16885</i>                                 | 6.34       | 8.73        | 3.45        | Sigma factor HrdD                       |
| <i>N1H47_11760</i>                                 | 17.20      | 101.83      | 8.70        | TetR family transcriptional regulator   |
| <i>N1H47_35560</i>                                 | 31.40      | 110.69      | 17.18       | Transcriptional regulatory protein TcrA |
| <i>N1H47_11815</i>                                 | 34.19      | 177.38      | 17.65       | MerR family transcriptional regulator   |
| <b>Biosynthesis of other secondary metabolites</b> |            |             |             |                                         |
| <i>N1H47_36795</i>                                 | 104.25     | 181.19      | 184.46      | Erythromycin esterase family protein    |
| <i>N1H47_05775</i>                                 | 306.07     | 486.94      | 471.45      | Type I polyketide synthase              |
| <i>N1H47_38515</i>                                 | 204.50     | 374.19      | 489.09      | Type I polyketide synthase              |
| <i>N1H47_05765</i>                                 | 178.15     | 232.59      | 212.45      | Type I polyketide synthase              |
| <i>N1H47_28655</i>                                 | 96.21      | 193.67      | 170.80      | Type III polyketide synthase            |
| <i>N1H47_05755</i>                                 | 150.89     | 250.20      | 187.16      | Type I polyketide synthase              |
| <i>N1H47_05780</i>                                 | 68.48      | 132.78      | 143.85      | Type I polyketide synthase              |
| <i>N1H47_38485</i>                                 | 21.01      | 2.70        | 4.96        | Type I polyketide synthase              |
| <i>N1H47_36780</i>                                 | 23.33      | 10.01       | 5.50        | Polyketide synthase                     |
| <i>N1H47_01840</i>                                 | 10.05      | 1.44        | 2.64        | Acyl transferase in polyketide synthase |
| <i>N1H47_31990</i>                                 | 14.80      | 7.97        | 4.47        | Beta-ketoacyl synthase                  |
| <i>N1H47_00660</i>                                 | 37.93      | 16.92       | 11.33       | Type I polyketide synthase              |
